# Supplementary material for: Advanced lipodystrophy reverses fatty liver in mice lacking adipocyte hormone-sensitive lipase
Source: PubMed Central journal article supplement (PMC7946939; doi:10.1038/s42003-021-01858-z), 2021-03-10
Supplement: 42003_2021_1858_MOESM3_ESM.pdf [file 42003_2021_1858_MOESM3_ESM.pdf]

## **Description of Additional Supplementary Files**

File Name: Supplementary Data 1

Description: All source data underlying the charts and graphs in the main table and figures.
